# Supplementary material for: Spatio-temporal variability in N&lt;sub&gt;2&lt;/sub&gt;O emissions from a tea-planted soil in subtropical central China
Source: Copernicus journal article supplement (doi:10.5194/gmd-2015-251), 2016-01-15
Supplement: Supplementary file 1 [file gmd-2015-251-supplement.pdf]

1. Spatio-temporal interpolations of the daily N<sub>2</sub>O fluxes (mgN m<sup>-2</sup> d<sup>-1</sup>) obtained using the separable (**Figure S1**), product-sum (**Figure S2**), metric (**Figure S3**) and sum-metric (**Figure S4**) models to fit semivariograms in spatio-temporal regression-kriging, respectively.

2. Spatial-temporal distributions of kriging standard deviations of the predicted N<sub>2</sub>O fluxes obtained using the separable (**Figure S5**), product-sum(**Figure S6**), metric (**Figure S7**) and sum-metric (**Figure S8**) models to fit semivariograms in spatio-temporal regression-kriging, respectively.

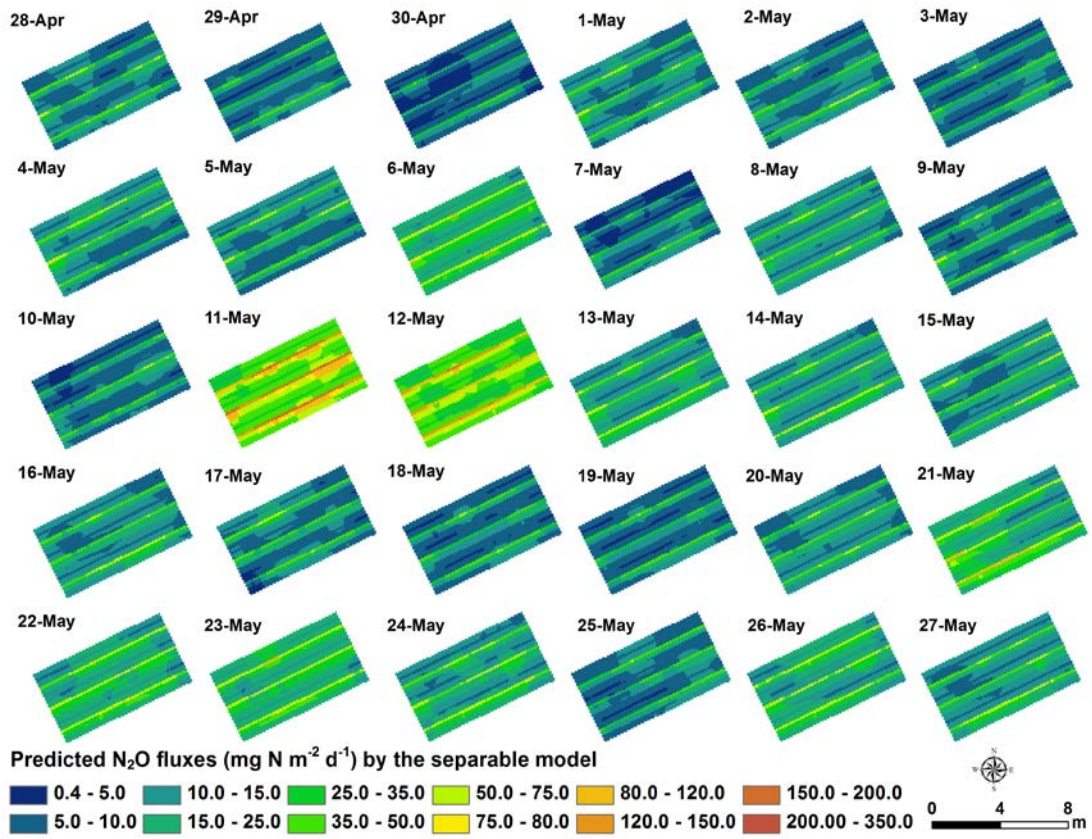

**Figure S1:** Spatio-temporal interpolation of the daily N<sub>2</sub>O fluxes (mgN m<sup>-2</sup> d<sup>-1</sup>) using the separable model to fit semivariogram in spatio-temporal regression-kriging.

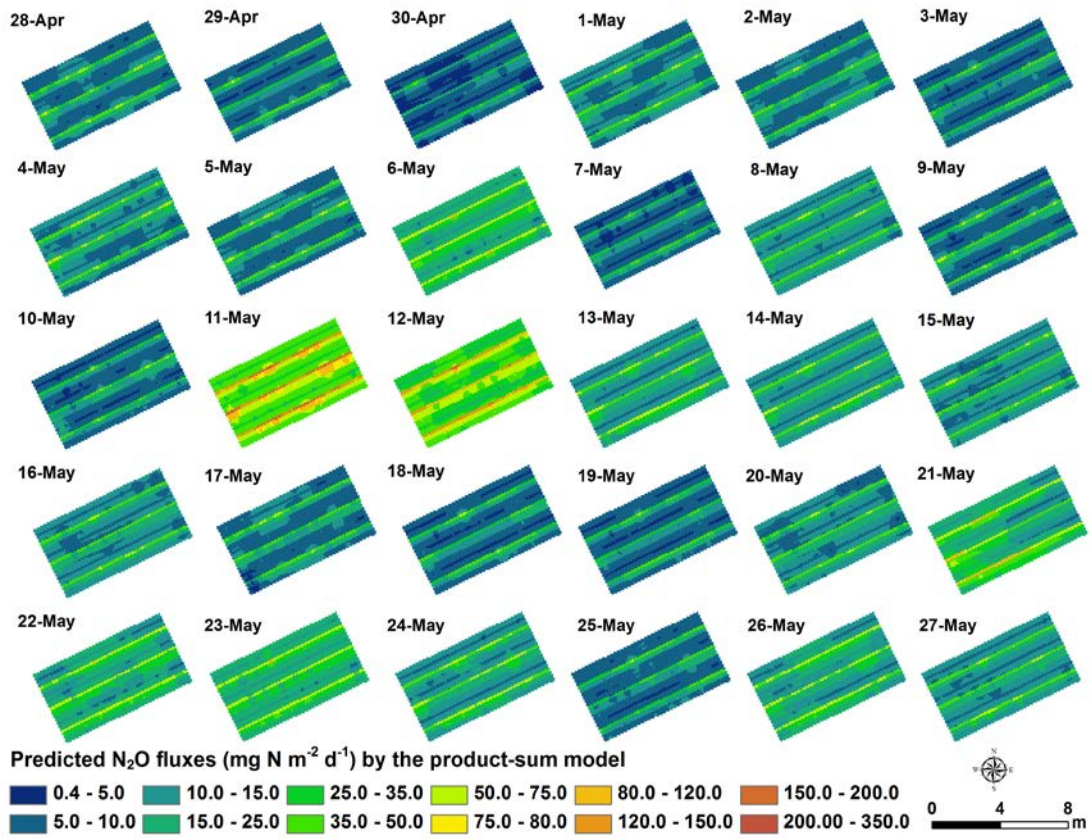

**Figure S2:** Spatio-temporal interpolation of the daily N<sub>2</sub>O fluxes (mgN m<sup>-2</sup> d<sup>-1</sup>) using the product-sum model to fit semivariogram in spatio-temporal regression-kriging.

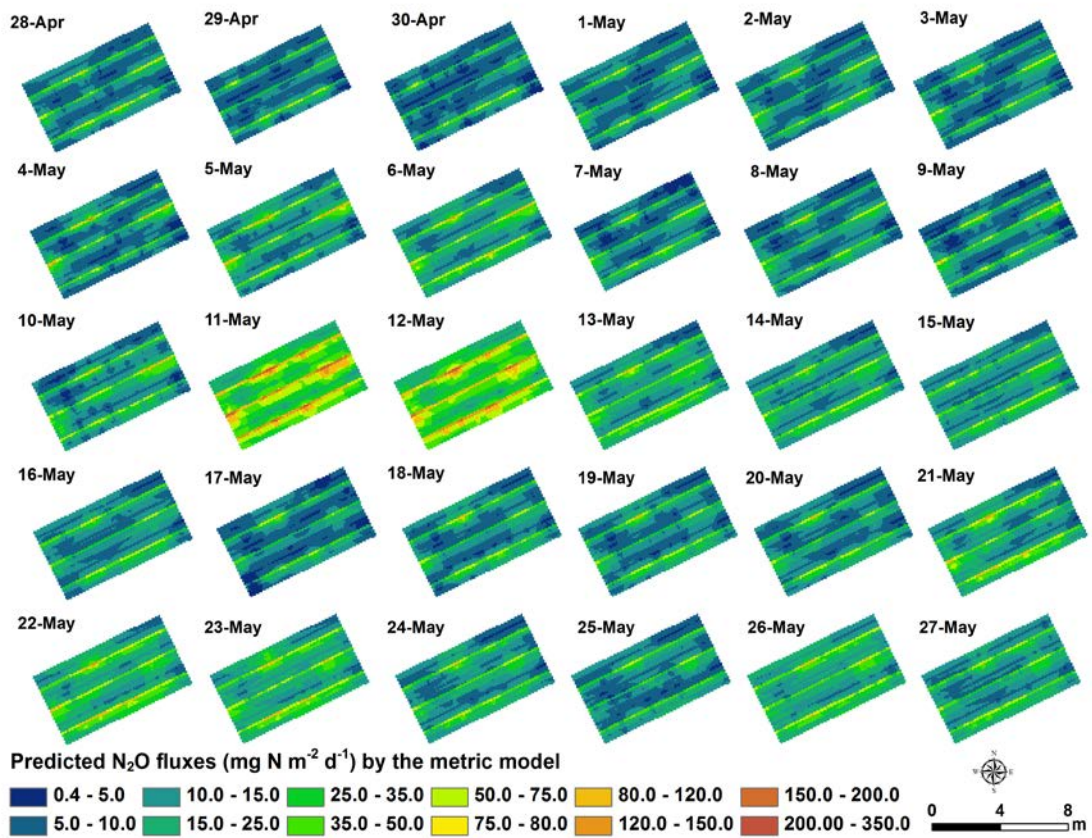

**Figure S3:** Spatio-temporal interpolation of the daily N<sub>2</sub>O fluxes (mgN m<sup>-2</sup> d<sup>-1</sup>) using the metric model to fit semivariogram in spatio-temporal regression-kriging.



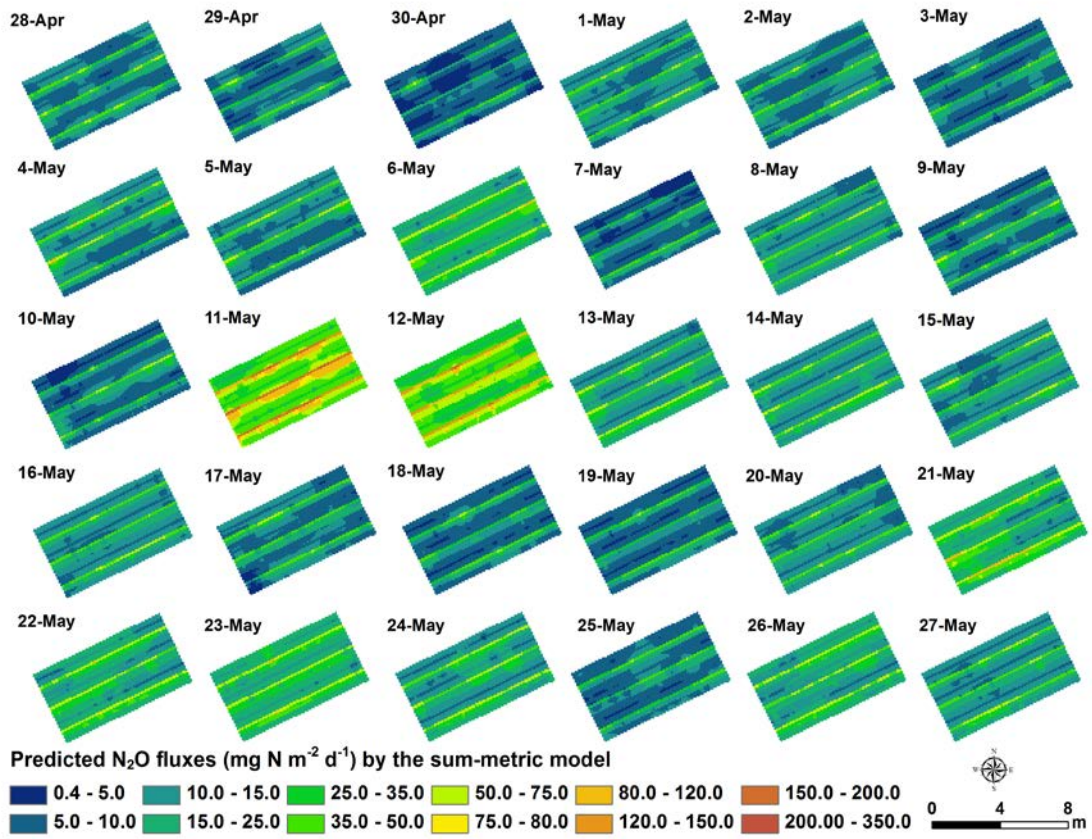

**FigureS4:** Spatio-temporal interpolation of the daily N<sub>2</sub>O fluxes (mgN m<sup>-2</sup> d<sup>-1</sup>) using the sum-metric model to fit semivariogram in spatio-temporal regression-kriging.

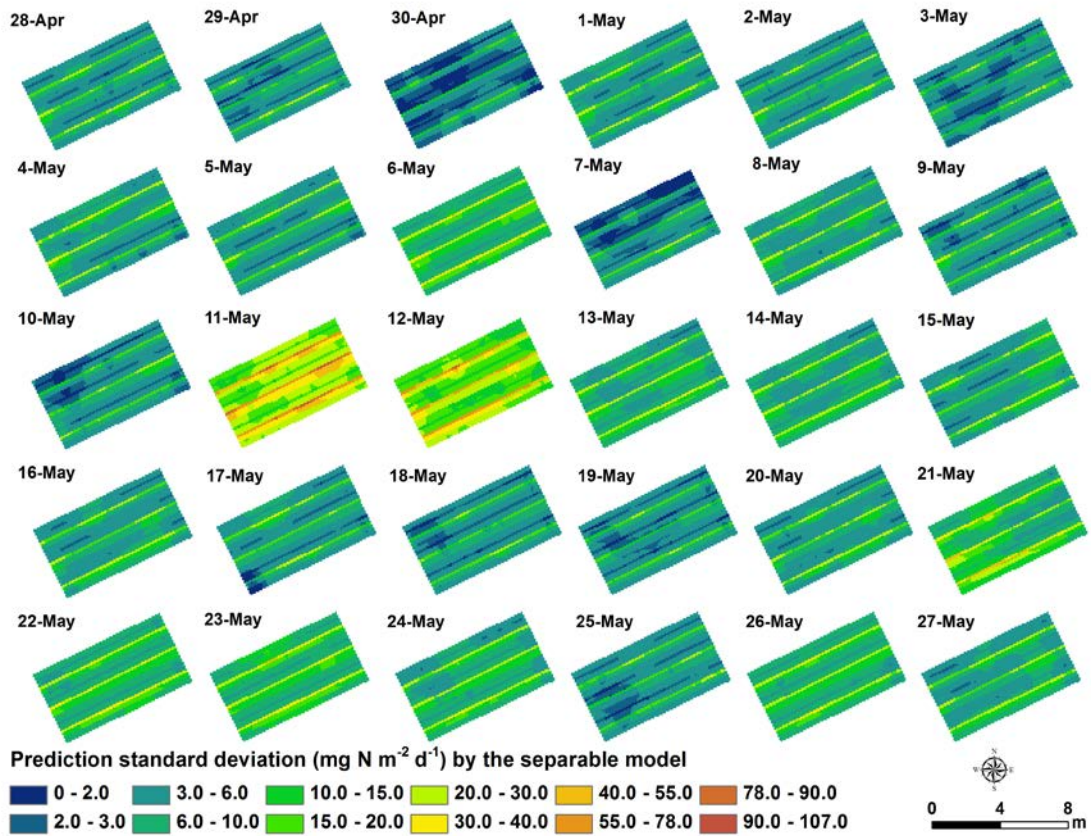

**Figure S5:** Spatial-temporal distribution of kriging standard deviations of the predicted  $\text{N}_2\text{O}$  fluxes using the separable to fit semivariogram in spatio-temporal regression-kriging.

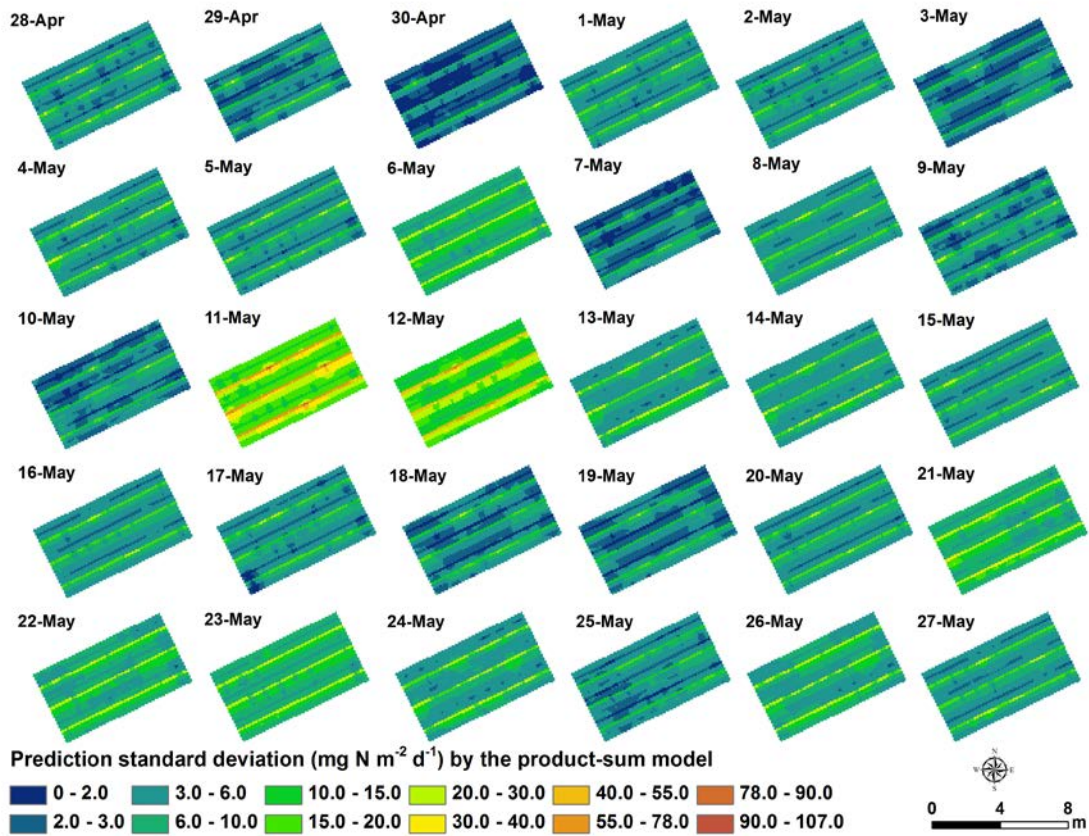

**Figure S6:** Spatial-temporal distribution of kriging standard deviations of the predicted  $\text{N}_2\text{O}$  fluxes using the product-sum to fit semivariogram in spatio-temporal regression-kriging.



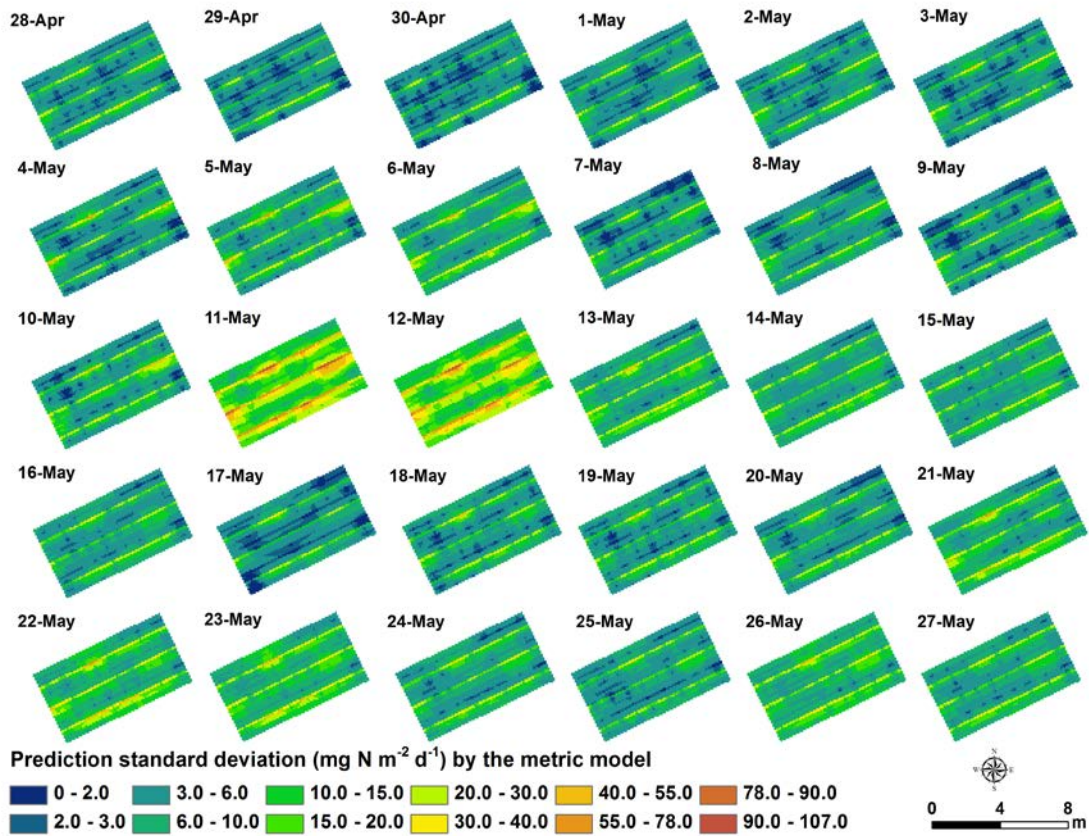

**Figure S7:** Spatial-temporal distribution of kriging standard deviations of the predicted  $\text{N}_2\text{O}$  fluxes using the metric to fit semivariogram in spatio-temporal regression-kriging.



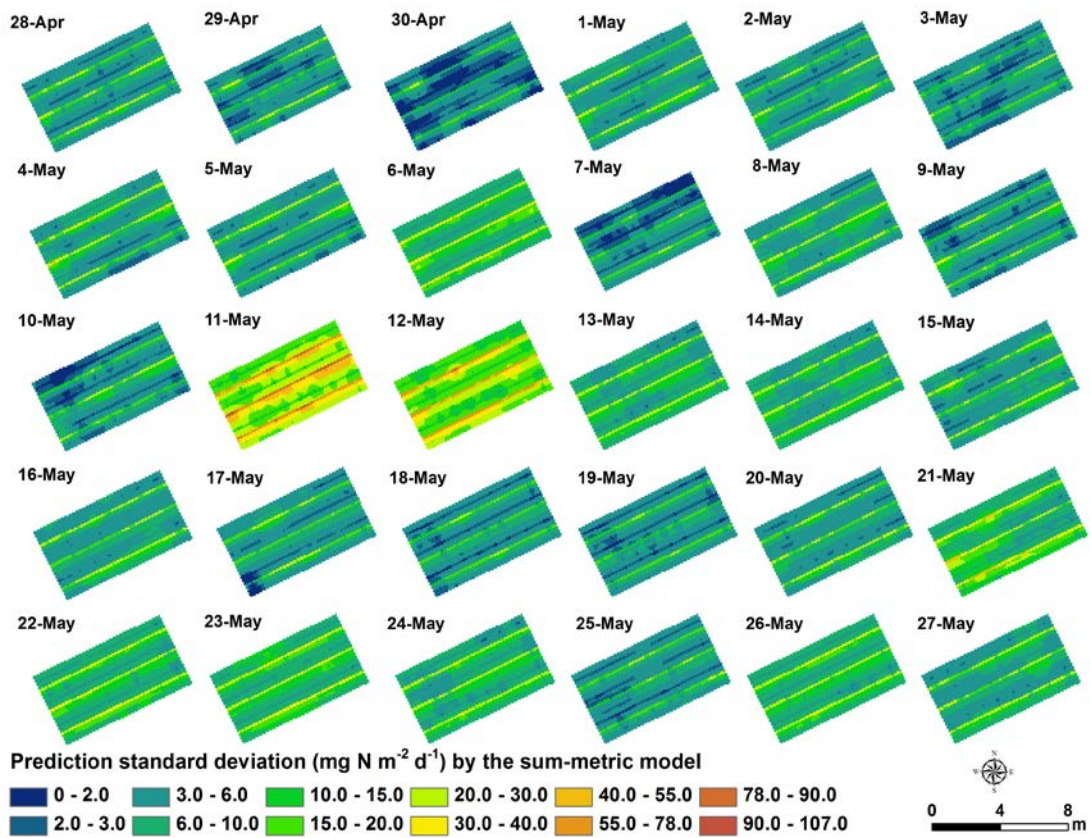

**Figure S8:** Spatial-temporal distribution of kriging standard deviations of the predicted  $\text{N}_2\text{O}$  fluxes using the sum-metric to fit semivariogram in spatio-temporal regression-kriging.
